# Supplementary material for: Catalytic activity boost of CeO2/Co3O4 nanospheres derived from CeCo-glycolate via yolk–shell structural evolution
Source: Royal Society of Chemistry journal article supplement (doi:10.1039/c9qi01162e), 2019-11-04
Supplement: c9qi01162e1.pdf [file c9qi01162e1.pdf]

## Catalytic Activity Boost of CeO<sub>2</sub>/Co<sub>3</sub>O<sub>4</sub> Nanospheres Derived from CeCo-glycolate via Yolk-shell Structural Evolution

Xilan Feng,<sup>a</sup> Dapeng Liu,<sup>\*a</sup> Wang Li,<sup>a</sup> Xin Jin,<sup>a</sup> Zheng Zhang,<sup>a</sup> and Yu Zhang<sup>\*abc</sup>

<sup>a</sup> Key Laboratory of Bio-Inspired Smart Interfacial Science and Technology of Ministry of Education, School of Chemistry, Beihang University, Beijing 100191, China.

<sup>b</sup> International Research Institute for Multidisciplinary Science, Beihang University, Beijing 100191, P. R. China.

<sup>c</sup> Beijing Advanced Innovation Center for Biomedical Engineering, Beihang University, Beijing 100191, P. R. China.

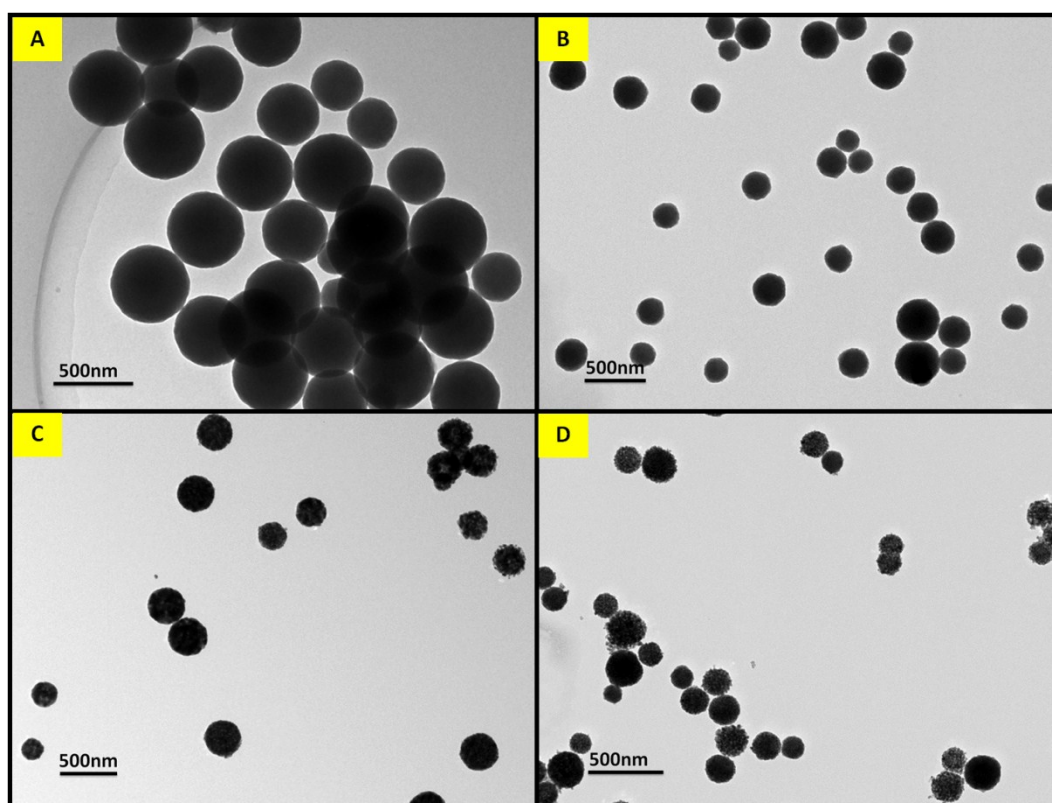

**Figure S1.** The low-magnification TEM images of (A) Co-gly, (B) CeCo-1/20-gly, (C) Co-p, and (D) CeCo-1/20.

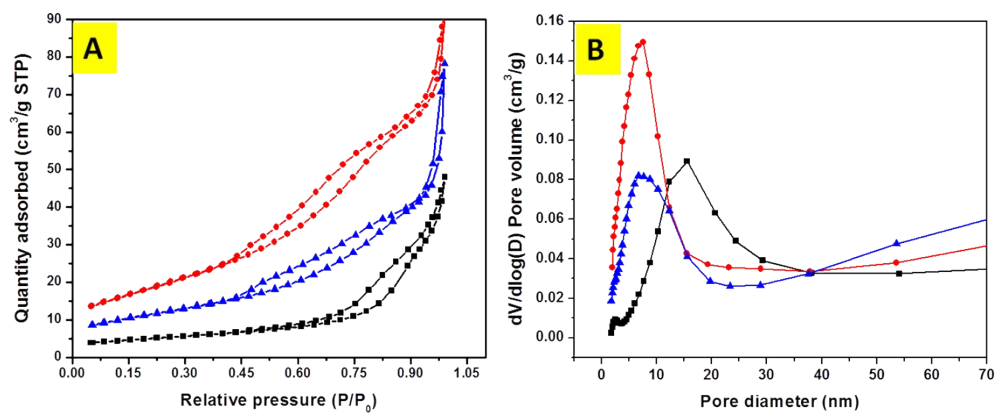

**Figure S2.** (A) Nitrogen sorption isotherm at 77 K and (B) pore size distribution of Co-p-1, CeCo-1/20-1 (red), and CeCo-1/20 (blue).

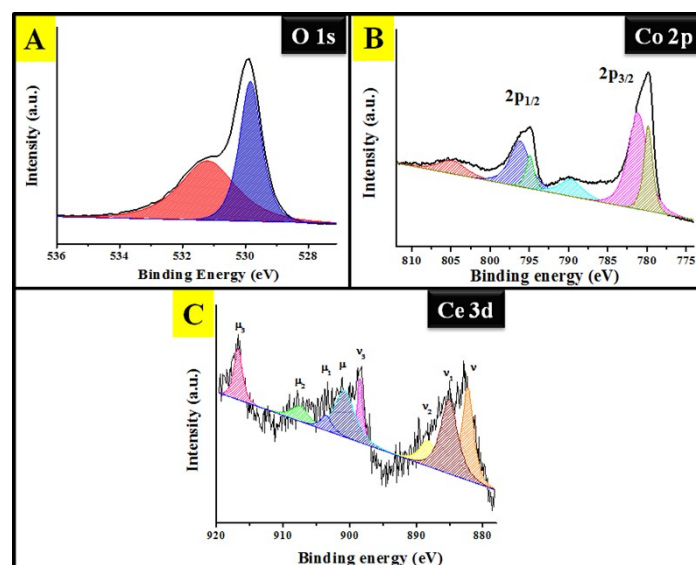

**Figure S3.** XPS spectra of CeCo-1/20-1: (A) O 1s, (B) Co 2p, and (C) Ce 3d;

**Table S1.** T<sub>10</sub>, T<sub>50</sub> and T<sub>90</sub> values of Co-p, CeCo-1/20, Co-p-1, and CeCo-1/20-1.

|              | T <sub>10</sub> (°C) | T <sub>50</sub> (°C) | T <sub>90</sub> (°C) |
|--------------|----------------------|----------------------|----------------------|
| Co-p         | 187                  | 210                  | 219                  |
| Co-p-1       | 108                  | 145                  | 160                  |
| CeCo-1/20    | 52                   | 104                  | 133                  |
| CeCo-1/20 -1 | 52                   | 92                   | 107                  |

**Table S2.** BET data of Co-p-1, CeCo-1/20-1 and CeCo-1/20.

|             | Surface Area (m <sup>2</sup> /g) | Pore Volume (cm <sup>3</sup> /g) | Pore Size (nm) |
|-------------|----------------------------------|----------------------------------|----------------|
| Co-p-1      | 17.57                            | 0.07                             | 13.43          |
| CeCo-1/20-1 | 66.24                            | 0.14                             | 6.79           |
| CeCo-1/20   | 40.79                            | 0.12                             | 9.65           |
